# Supplementary material for: Streamlining Homogeneous Glycoprotein Production for Biophysical and Structural Applications by Targeted Cell Line Development
Source: PubMed Central journal article supplement (PMC3235087; doi:10.1371/journal.pone.0027829), 2011-12-09
Supplement: pone.0027829.s001.pdf [file pone.0027829.s001.pdf]

**Table S1**

Details of LAMP expression constructs

| Protein <sup>a</sup> | Domain <sup>b</sup> | GenBank accession | Construct <sup>c</sup> | PCR primer <sup>d</sup> | Secreted protein detected | Stable cell line |
|----------------------|---------------------|-------------------|------------------------|-------------------------|---------------------------|------------------|
| btLAMP2              | lum.                | NP_001029742      | nat. SP, 1-368         | 826, 812                | yes                       |                  |
| btLAMP2              | lum.                | NP_001029742      | Ig SP, 29-368          | 809, 812                | no                        |                  |
| btLAMP2              | prox.               | NP_001029742      | Ig SP, 217-368         | 811, 812                | no                        |                  |
| hLAMP1               | dist.               | AAH21288          | Ig SP, 29-195          | 789, 790                | no                        |                  |
| hLAMP1               | lum.                | AAH21288          | Ig SP, 29-381          | 789, 792                | yes                       |                  |
| hLAMP1               | prox.               | AAH21288          | Ig SP, 218-381         | 791, 792                | yes                       |                  |
| hLAMP1               | dist.               | AAH21288          | nat. SP, 1-195         | 821, 790                | no                        |                  |
| hLAMP1               | lum.                | AAH21288          | nat. SP, 1-381         | 821, 792                | no                        |                  |
| hLAMP2               | lum.                | AAH02965          | nat. SP, 1-371         | 827, 816                | yes                       |                  |
| hLAMP2               | dist.               | NP_002285         | Ig SP, 26-193          | 813, 814                | yes                       |                  |
| hLAMP2               | dist.               | NP_002285         | nat. SP, 1-193         | 827, 814                | yes                       |                  |
| hLAMP2               | lum.                | AAH02965          | Ig SP, 26-371          | 813, 816                | no                        | yes              |
| hLAMP2               | prox.               | AAH02965          | Ig SP, 220-371         | 815, 816                | no                        |                  |
| hLAMP3               | dist.               | AAH32940          | Ig SP, 28-210          | 817, 818                | no                        |                  |
| hLAMP3               | prox.               | AAH32940          | Ig SP, 222-381         | 819, 820                | yes                       | yes              |
| hLAMP3               | lum.                | AAH32940          | nat. SP, 1-210         | 817, 820                | no                        |                  |

|         |       |              |                |          |     |     |
|---------|-------|--------------|----------------|----------|-----|-----|
| mLAMP1  | prox. | NP_034814    | Ig SP, 209-370 | 795, 796 | yes |     |
| mLAMP1  | dist. | NP_034814    | Ig SP, 25-189  | 793, 794 | yes |     |
| mLAMP1  | lum.  | NP_034814    | Ig SP, 25-370  | 793, 796 | yes |     |
| mLAMP1  | dist. | NP_034814    | nat. SP, 1-189 | 822, 794 | yes |     |
| mLAMP1  | lum.  | NP_034814    | nat. SP, 1-370 | 822, 796 | yes |     |
| mLAMP2  | lum.  | NP_001017959 | Ig SP, 26-376  | 801, 804 | no  |     |
| mLAMP2  | dist. | NP_001017959 | Ig SP, 26-189  | 801, 802 | yes | yes |
| mLAMP2  | prox. | NP_001017959 | Ig SP, 224-376 | 803, 804 | no  |     |
| mLAMP2  | lum.  | NP_001017959 | nat. SP, 1-376 | 824, 804 | yes | yes |
| rLAMP2  | dist. | AAH61990     | Ig SP, 27-189  | 805, 806 | yes | yes |
| rLAMP2  | dist. | AAH61990     | nat. SP, 1-189 | 825, 806 | yes |     |
| rLAMP2  | lum.  | AAH61990     | Ig SP, 27-372  | 805, 808 | yes |     |
| rLAMP2  | prox. | AAH61990     | Ig SP, 220-372 | 807, 808 | no  |     |
| xlLAMP1 | dist. | AAH77933     | Ig SP, 28-196  | 797, 798 | no  |     |
| xlLAMP1 | prox. | AAH77933     | Ig SP, 220-381 | 799, 800 | no  |     |
| xlLAMP1 | dist. | AAH77933     | nat. SP, 1-196 | 823, 798 | yes |     |
| xlLAMP1 | lum.  | AAH77933     | nat. SP, 1-381 | 797, 800 | yes |     |

<sup>a</sup>prefixes: bt=bos taurus, h=human, m=mouse, xl=xenopus laevis, r=rat.

<sup>b</sup>lum.=full luminal domain, prox./dist.=the half proximal/distal to the membrane.

<sup>c</sup>Ig SP=immune globulin signal peptide of SwissProt HVM06\_MOUSE, nat. SP=native signal peptide.

<sup>d</sup>PCR primer sequences are listed in Table S2.
