# Supplementary material for: Streamlining Homogeneous Glycoprotein Production for Biophysical and Structural Applications by Targeted Cell Line Development
Source: PubMed Central journal article supplement (PMC3235087; doi:10.1371/journal.pone.0027829), 2011-12-09
Supplement: pone.0027829.s002.pdf [file pone.0027829.s002.pdf]

**Table S2**

Sequences of the primers listed in Table S1.

| PCR Primer | Sequence                                      |
|------------|-----------------------------------------------|
| 789        | ACCggTgTTCACTCCgCAATgTTTATggTgAAAAATggCA      |
| 790        | AAAgtACAggTTCTCCCTgTCTTgTTCACAgCgTg           |
| 791        | ACCggTgTTCACTCCTCTgTggACAAgtACAACgTgA         |
| 792        | AAAgtACAggTTCTCgCTgTTCTCgTCCAgCgA             |
| 793        | ACCggTgTTCACTCCCTCTTgAggTgAAAAACAATggC        |
| 794        | AAAgtACAggTTCTCTCCATCCTgTgTgCAgTgT            |
| 795        | ACCggTgTTCACTCCACTgTATCCAAgtACAATgTTACTggT    |
| 796        | AAAgtACAggTTCTCgTTgTTACCATCCTgAACACACTC       |
| 797        | ACCggTgTTCACTCCgTTCAATTTgAAgtgAAAgATggCAA     |
| 798        | AAAgtACAggTTCTCAATATCCTCACTgCACgTgCT          |
| 799        | ACCggTgTTCACTCCgTggTgCAgTATTCTgTAAATCgA       |
| 800        | AAAgtACAggTTCTCCCCgTTTTATCCAATgAgCA           |
| 801        | ACCggTgTTCACTCCTTgATAgTTAATTTgACAgATTCAAAgggT |
| 802        | AAAgtACAggTTCTCTTggTCTTCTTCACACACTTgTTC       |
| 803        | ACCggTgTTCACTCCACCgTTggAAACTACAgCATTAg        |
| 804        | AAAgtACAggTTCTCATCTgCACTgCAgTCTTgAgC          |
| 805        | ACCggTgTTCACTCCTTgAAACTTAATTTgACAgATTCAAAggg  |
| 806        | AAAgtACAggTTCTCTTTgTCCTCCTTACACACTTgTTC       |
| 821        | CCggTCgCCACCATggCggCCCCggCAgCg                |
| 822        | CCggTCgCCACCATggCggCCCCggCgCCC                |
| 823        | CCggTCgCCACCATgAgTTggAggCAAgtCAAgtAgC         |
| 824        | CCggTCgCCACCATgTgCCTCTCTCCggTTAAAgg           |
| 825        | CCggTCgCCACCATgCgCCTCCTCTCTCCgg               |
| 826        | CCggTCgCCACCATggTgTgCTTCCgCCTCg               |
| 827        | CCggTCgCCACCATggTgTgCTTCCgCCTCTTC             |
| 807        | ACCggTgTTCACTCCAggTTggAAACTACACCATTTC         |
| 808        | AAAgtACAggTTCTCATCTgCACTgCAgTCTTgAgC          |

|     |                                                |
|-----|------------------------------------------------|
| 809 | ACCggTgTTCACCTCCTTggAACTTAATTTgACAgATTCATCAAAC |
| 811 | ACCggTgTTCACCTCCgTCggATCCTATTCAgTTgTAAATAgC    |
| 812 | AAAgtACAggTTCTCATCCAgCgAACACTCTTggg            |
| 813 | ACCggTgTTCACCTCCTTATgCATTggAACTTAATTTgACAgA    |
| 814 | AAAgtACAggTTCTCTTTgTCTTTATCACACAggAACTCATT     |
| 815 | ACCggTgTTCACCTCCgCTggAACCTATTCAgTTAATAATggC    |
| 816 | AAAgtACAggTTCTCATCTgCACTgCAgTCTTgAgC           |
| 817 | ACCggTgTTCACCTCCAAAgCATTTCCAggAACCAgAg         |
| 818 | AAAgtACAggTTCTCCgTggAggCAggTgCA                |
| 819 | ACCggTgTTCACCTCCTCAgTCAAgACTggAATTTATCAggT     |
| 820 | AAAgtACAggTTCTCTgTgTAgtCAgACgAgCACTC           |
